# Supplementary material
Source: Springer Nature journal article supplement (https://www.springermedizin.de/resource/supplementary/12885_2008_1438_MOESM4_ESM.pdf/9472010)
Supplement: MOESM4 [file 9472010]

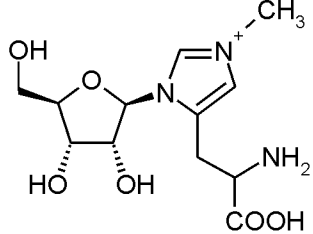

1-ribosyl-3-methyl-5-(2-amino-carboxyethyl)-imidazolium  
(M-1)

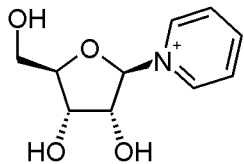

1-ribosylpyridinium  
(M-2)

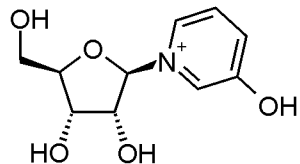

1-ribosyl-3-hydroxy-pyridinium  
(M-3)

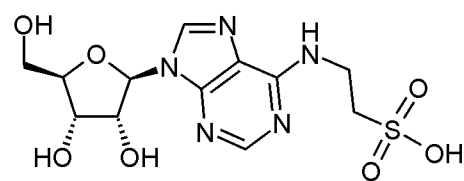

9-ribosyl-6-taurinopurine  
(M-4)

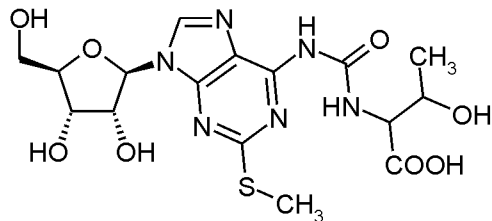

2-methylthio-N<sup>6</sup>-threonylcarbamoyladenine  
(ms<sup>2</sup>t<sup>6</sup>A)

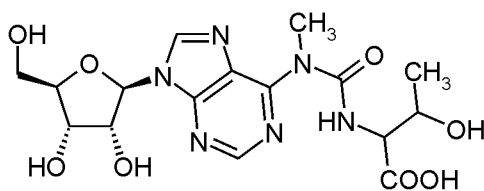

N<sup>6</sup>-methyl-N<sup>6</sup>-threonylcarbamoyladenine  
(m<sup>6</sup>t<sup>6</sup>A)

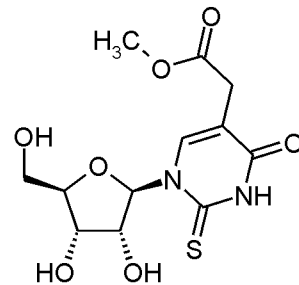

5-methoxycarbonylmethyl-2-thiouridine  
(mcm<sup>5</sup>s<sup>2</sup>U)
